# Supplementary material for: Osteochondral allograft transplantation for large Hill-Sachs lesions: a retrospective case series with a minimum 2-year follow-up
Source: J Orthop Surg Res. 2019 Nov 7;14:344. doi: 10.1186/s13018-019-1366-8 (PMC6836456; doi:10.1186/s13018-019-1366-8)
Supplement: Supplementary file 1 — Additional file 1. The patient’s data. [file 13018_2019_1366_MOESM1_ESM.xlsx]

## Sheet: 工作表3
No	age	sex	hand dominance	smoking	number of dislocation	age at the first dislocation	duration of instability	preoperative size of HSL	concommitant procedures	followp-up	bone union	bone resorption	residual loss at 1 year	residual loss at 2 years	术前ASES	术后ASES	术前constant	术后constant	术前rowe	术后rowe	pre-ff	post-ff	pre-er	post-er	pre-ir	post-ir
1	33	female	no	no	10	25	8	36.8	no	24	6	yes	11.3	11.6	56	85	76	84	20	95	150	160	60	45	T7	T7
2	27	female	yes	no	8	20	7	32.3	bankart repair	24	3	no			64	100	81	85	30	100	160	170	65	70	T9	T8
3	24	male	yes	no	10	17	7	31.2	bankart repair	24	3	no			63	85	81	87	30	100	165	165	65	70	T6	T5
4	29	female	no	no	15	19	10	38.8	bankart repair	36	3	yes	8.4	8.5	63	93	88	92	35	100	170	170	60	70	T6	T7
5	30	male	yes	yes	3	24	6	40.2	bankart repair	24	3	yes	8.2	8.3	56	100	86	85	20	95	150	170	70	55	T5	T6
6	43	female	yes	no	20	23	20	37.8	bankart repair	24	3	yes	13.6	14.2	49	100	77	90	15	95	160	160	45	60	T7	T6
7	26	male	yes	yes	15	22	4	35.1	bankart repair	24	3	yes	14	14.8	49	100	81	92	30	100	170	165	50	50	T7	T6
8	32	male	no	no	10	25	7	34.8	bankart+SLAP repair	36	6	no			49	100	77	92	15	95	160	175	60	60	T7	T7
9	28	male	yes	yes	12	20	8	30.2	bankart repair	24	3	no			56	93	74	87	30	95	170	180	50	70	T8	T8
10	36	male	yes	yes	8	20	16	36.4	no	24	3	yes	13.6	12.9	42	100	74	87	15	95	160	160	45	55	T9	T7
11	19	female	no	no	5	16	3	32.8	bankart repair	48	3	no			56	100	88	90	30	100	170	180	50	60	T7	T8
12	18	male	yes	yes	20	16	2	36.7	bankart repair	24	3	no			63	93	85	91	25	95	150	165	60	70	T6	T7
13	22	male	yes	yes	8	16	6	36.4	bankart repair	24	3	no			56	100	84	92	20	100	150	170	40	70	T8	T7
14	26	male	yes	yes	20	20	6	42.1	bankart repair+SLAP debridement	36	3	yes	12.8	12.2	71	100	81	89	20	100	165	180	55	70	T6	T8
15	29	female	yes	no	9	21	8	33.8	bankart repair	24	3	no			56	93	83	87	30	100	160	180	50	50	T7	T5
16	26	female	no	no	10	18	8	34.2	bankart repair	36	6	on			56	100	91	93	15	95	160	160	55	60	T5	T7
17	36	male	no	yes	6	30	6	36.4	bankart repair	24	3	no			49	100	81	96	35	100	150	180	55	70	T6	T7
18	19	male	yes	no	15	16	3	34.6	bankart repair	24	3	no			49	100	73	90	20	100	170	160	50	50	T7	T6
19	46	male	yes	yes	10	28	18	37.8	bankart repair	24	3	yes	15.7	16	56	100	81	85	15	95	155	180	55	70	T6	T7
